# Supplementary material for: Analytical Performance Characteristics of a New Transcription-Mediated Amplification Assay for Treponema pallidum
Source: PubMed Central journal article supplement (PMC8373238; doi:10.1128/jcm.00511-21), 2021-07-19
Supplement: jcm.00511-21-s0001.pdf [file jcm.00511-21-s0001.pdf]

Table S1. *In silico* nucleotide base difference analysis of 23S rRNA sequences from various treponeme species compared to *T. pallidum* ssp. *pallidum* in the 23S rRNA target region of the *Treponema pallidum* TMA assay.

| <b>Species (Strain; NCBI Genbank Accession Number)</b>         | <b>% base difference from <i>T. pallidum</i> ssp. <i>pallidum</i> in TMA assay target region</b> | <b>TMA % cross reactivity (n=3)<sup>a</sup></b> |
|----------------------------------------------------------------|--------------------------------------------------------------------------------------------------|-------------------------------------------------|
| <i>T. pallidum</i> ssp. <i>endemicum</i> (Samoa F; CP007548.1) | 0                                                                                                | 100                                             |
| <i>T. pallidum</i> ssp. <i>pertenue</i> (CDC2; CP002375.1)     | 0                                                                                                | 100                                             |
| <i>T. paraluisuniculi</i> (Cuniculi A; JX120547.1)             | 0                                                                                                | 100                                             |
| <i>T. phagedenis</i> (4A; AQCFO1)                              | 18                                                                                               | 0                                               |
| <i>T. denticola</i> (OTK; AGDYO1)                              | 27                                                                                               | 0                                               |
| <i>T. succinifaciens</i> (DSM 2489; CP002631.1)                | 27                                                                                               | NT                                              |
| <i>T. primitia</i> (ZAS-2; NR_076709.1)                        | 28                                                                                               | NT                                              |
| <i>T. pedis</i> (T M1; AOTMO1)                                 | 28                                                                                               | NT                                              |
| <i>T. caldarium</i> (H1; NR_076899.1)                          | 30                                                                                               | NT                                              |
| <i>T. azotonutricium</i> (ZAS-9; NR_076708.1)                  | 30                                                                                               | NT                                              |
| <i>T. socranskii</i> (ssp. <i>paredis</i> ; NZ_KE332516.1)     | 34                                                                                               | NT                                              |
| <i>T. putidum</i> (OMZ758; CP009228.1)                         | 38                                                                                               | NT                                              |
| <i>T. brennaborensis</i> (DD5/3; NR_076878.1)                  | 40                                                                                               | NT                                              |
| <i>T. lecithinolyticum</i> (ATCC700322; NZ_KI260563.1)         | 41                                                                                               | NT                                              |
| <i>T. maltophilum</i> (ATCC 51939; ATFF01000006.1)             | 59                                                                                               | NT                                              |

<sup>a</sup> TMA results from Table 2. NT, not tested.
